# Supplementary material for: Urinary Bladder Weight and Function in a Rat Model of Mild Hyperglycemia and Its Treatment With Dapagliflozin
Source: PubMed Central journal article supplement (PMC6706456; doi:10.3389/fphar.2019.00911), 2019-08-16

## Online supplement to

### Urinary bladder weight and function in a rat model of mild hyperglycemia and its treatment with dapagliflozin

**Zeynep Elif Yesilyurt, Betül Rabia Erdogan, Irem Karaomerlioglu, Ayhanım Elif Müderrisoglu, Martin Christian Michel, Ebru Arioglu-Inan**

Supplemental Table 1: Physiological parameters of animals of batch 1 (pilot study) at study end. Data are means  $\pm$  SD of 6 rats. Bladder weight did not differ significantly between diabetic and control animals (null hypothesis not rejected).

|                              | Control         | Dapagliflozin   | Diabetic        | Treated diabetic |
|------------------------------|-----------------|-----------------|-----------------|------------------|
| Blood glucose, mg/dl         | 112 $\pm$ 6     | 106 $\pm$ 10    | 401 $\pm$ 95    | 174 $\pm$ 18     |
| Body weight, g               | 487 $\pm$ 35    | 459 $\pm$ 10    | 395 $\pm$ 33    | 393 $\pm$ 39     |
| Bladder weight, mg           | 152 $\pm$ 14    | 180 $\pm$ 24    | 207 $\pm$ 84    | 193 $\pm$ 33     |
| Bladder/body weight, g/100 g | 0.31 $\pm$ 0.03 | 0.39 $\pm$ 0.05 | 0.53 $\pm$ 0.25 | 0.50 $\pm$ 0.09  |

Supplemental Table 2: Contractile responses of bladder strips of animals of batch 2. Data are means  $\pm$  SD of 10 rats, except for diabetic group (n = 9) with 2-4 strips being measured per rat.

|                                         | Control         | Dapagliflozin   | Diabetic        | Treated diabetic |
|-----------------------------------------|-----------------|-----------------|-----------------|------------------|
| KCl peak, mN/mg                         | 280 $\pm$ 99    | 276 $\pm$ 56    | 393 $\pm$ 210   | 299 $\pm$ 56     |
| Carbachol peak pEC <sub>50</sub>        | 6.00 $\pm$ 0.20 | 6.04 $\pm$ 0.24 | 6.20 $\pm$ 0.47 | 5.99 $\pm$ 0.32  |
| Carbachol peak E <sub>max</sub> , mN/mg | 491 $\pm$ 105   | 568 $\pm$ 117   | 726 $\pm$ 398   | 620 $\pm$ 108    |
| Carbachol plateau, mN/mg                | 148 $\pm$ 42    | 159 $\pm$ 33    | 218 $\pm$ 128   | 157 $\pm$ 42     |

Supplemental Table 3: Contractile responses of bladder strips of animals of batch 1 (pilot study). Data are means  $\pm$  SD of 6 rats with 2-4 strips being measured per rat.

|                                         | Control         | Dapagliflozin   | Diabetic        | Treated diabetic |
|-----------------------------------------|-----------------|-----------------|-----------------|------------------|
| KCl peak, mN/mm                         | 267 $\pm$ 82    | 299 $\pm$ 92    | 276 $\pm$ 93    | 291 $\pm$ 75     |
| KCl peak, mN/mg                         | 237 $\pm$ 68    | 238 $\pm$ 48    | 219 $\pm$ 54    | 253 $\pm$ 72     |
| Carbachol peak pEC <sub>50</sub>        | 6.00 $\pm$ 0.17 | 6.01 $\pm$ 0.11 | 6.01 $\pm$ 0.17 | 6.11 $\pm$ 0.22  |
| Carbachol peak E <sub>max</sub> , mN/mm | 521 $\pm$ 122   | 586 $\pm$ 119   | 565 $\pm$ 162   | 506 $\pm$ 74     |
| Carbachol peak E <sub>max</sub> , mN/mg | 466 $\pm$ 80    | 478 $\pm$ 120   | 444 $\pm$ 64    | 456 $\pm$ 103    |
| Carbachol plateau, mN/mm                | 177 $\pm$ 57    | 177 $\pm$ 27    | 176 $\pm$ 46    | 167 $\pm$ 31     |
| Carbachol plateau, mN/mg                | 156 $\pm$ 36    | 151 $\pm$ 30    | 148 $\pm$ 48    | 146 $\pm$ 25     |

Supplemental Table 4: Relaxant responses of bladder strips in batch 1 (pilot study). Data are means  $\pm$  SD of 6 rats with 1 strip being measured per rat for the  $\beta$ -adrenoceptor agonists and the mean of 1-3 strips for forskolin. Maximum relaxation responses ( $E_{max}$ ) and those to 10  $\mu$ M forskolin are expressed as % of tone, i.e. force prior to addition of first agonist concentration (“carbachol plateau”, see Table 2 in main manuscript)

|                   | Control       | Dapagliflozin | Diabetic      | Treated diabetic |
|-------------------|---------------|---------------|---------------|------------------|
| Isoprenaline      |               |               |               |                  |
| pEC <sub>50</sub> | 6.9 $\pm$ 0.2 | 7.0 $\pm$ 0.2 | 6.9 $\pm$ 0.2 | 6.9 $\pm$ 0.4    |
| E <sub>max</sub>  | 52 $\pm$ 21   | 51 $\pm$ 11   | 58 $\pm$ 4    | 54 $\pm$ 8       |
| Fenoterol         |               |               |               |                  |
| pEC <sub>50</sub> | 5.7 $\pm$ 1.1 | 5.4 $\pm$ 0.2 | 5.4 $\pm$ 0.8 | 5.6 $\pm$ 0.8    |
| E <sub>max</sub>  | 50 $\pm$ 27   | 45 $\pm$ 17   | 54 $\pm$ 13   | 49 $\pm$ 7       |
| 30 $\mu$ M        | 54 $\pm$ 24   | 48 $\pm$ 16   | 59 $\pm$ 6    | 55 $\pm$ 4       |
| CL 316,243        |               |               |               |                  |
| pEC <sub>50</sub> | 7.4 $\pm$ 0.2 | 7.5 $\pm$ 0.1 | 6.8 $\pm$ 1.2 | 7.5 $\pm$ 0.4    |
| E <sub>max</sub>  | 74 $\pm$ 10   | 75 $\pm$ 7    | 70 $\pm$ 16   | 70 $\pm$ 8       |
| Forskolin         |               |               |               |                  |
| 10 $\mu$ M        | -29 $\pm$ 28  | -34 $\pm$ 12  | -17 $\pm$ 12  | -23 $\pm$ 6      |

Supplemental Figure 1: Chemical structure of dapagliflozin.

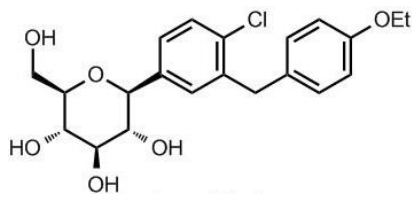

Supplemental Figure 2: Time course of blood glucose and body weight of control rats (black symbol), control rats treated with dapagliflozin (blue symbols), HFD + low-dose STZ-treated rats (red symbols) and HFD + low-dose STZ + dapagliflozin-treated rats (green symbol). Each data point represents mean  $\pm$  SD of 10 rats (9 for HFD + low-dose STZ group). As start of treatment with dapagliflozin differed slightly between animals, data are shown relative to the individual start of treatment (week 18-19).

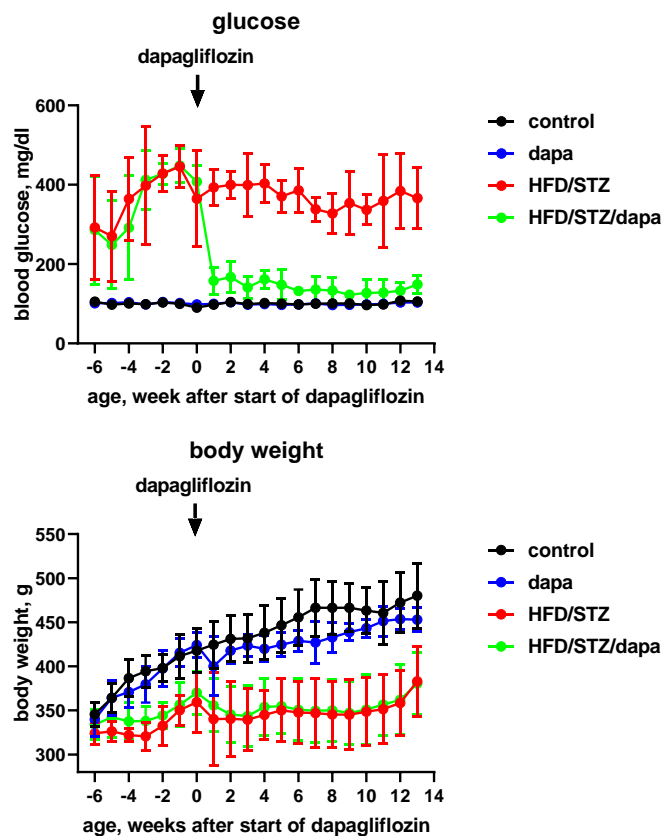

Supplement: DataSheet_1.pdf [file DataSheet_1.pdf]
